# Supplementary material
Source: publisher figshare collection journal article supplement (https://tandf.figshare.com/articles/dataset/_/1054782)
Supplement: Supplementary file 1 [file 1]

# Online Appendix for Numerically Accelerated Importance Sampling for Nonlinear Non-Gaussian State Space Models \*

Siem Jan Koopman<sup>(a,b)</sup> André Lucas<sup>(a)</sup> Marcel Scharth<sup>(c)</sup>

<sup>(a)</sup> VU University Amsterdam and Tinbergen Institute, The Netherlands

<sup>(b)</sup> CREATES, Aarhus University, Denmark

<sup>(c)</sup> Australian School of Business, University of New South Wales, Australia

May 2014

---

\*We would like to thank the seminar participants at the University of Mannheim, TI Amsterdam, Chicago Booth School of Business, Université Paris I, Sorbonne, and the 4<sup>th</sup> CSDA conference in London, for their insightful comments. S.J. Koopman acknowledges the support from CREATES, Center for Research in Econometric Analysis of Time Series (DNRF78), funded by the Danish National Research Foundation. A. Lucas acknowledges the financial support of the Dutch National Science Foundation (NWO, grant VICI453-09-005). M. Scharth acknowledges partial support from the Australian Research Council grant DP0667069. Contact author: Siem Jan Koopman ([s.j.koopman@vu.nl](mailto:s.j.koopman@vu.nl)).

## A Numerical integration

When a continuous function  $\varphi(x)$  is known analytically for any  $x$ , we can efficiently evaluate integrals of the form

$$\int \varphi(x) \, dx, \tag{1}$$

by numerical integration methods which are fast, reliable, and accurate. Numerical integration is not prone to simulation uncertainty and conforms to any desired degree of precision.

The numerical evaluation of the integral in (1) via a Gauss-Hermite quadrature designates a set of  $M$  abscissae  $z_j$  and associated weights  $h(z_j)$  with  $j = 1, \dots, M$ . We compute the numerical approximation as

$$\int_{-\infty}^{\infty} \varphi(x) \, dx = \int_{-\infty}^{\infty} e^{-x^2} [e^{x^2} \varphi(x)] \, dx \approx \sum_{j=1}^M h(z_j) e^{z_j^2} \varphi(z_j), \tag{2}$$

where  $M$  is typically between 20 and 30, and where the weights  $h(z_j)$  can be tabulated for different values of  $M$ . For a more detailed discussion on Gauss-Hermite quadrature, we refer to Monahan (2001). We refer to numerical integration in a general way in our discussions below but where possible we aim to work with Gaussian integrals for which analytical solutions may be available in specific applications. In such cases, the use of the analytical expression will bring further efficiency to our importance sampling method. Here we focus on the state space model of Section 2 with scalar signal  $\theta_t$ , that is  $q = 1$ . Although all results are valid for a high dimensional vector  $\theta_t$ , this setting brings additional and specific computational challenges that are beyond the scope of this paper. However, our treatment still allows for a high-dimensional state vector  $\alpha_t$ .

## B The NAIS, EIS and SPKD algorithms

Algorithms 1 and 2 outline the full procedure for likelihood estimation using the NAIS method. Algorithm 1 shows how we compute the likelihood estimate given the importance parameters (without control variables). Algorithm 2 reviews the method for obtaining the importance parameters. Algorithms 3 and 4 review the Shephard and

Pitt (1997) and Durbin and Koopman (1997) (SPDK) and EIS methods for obtaining the importance parameters as implemented in our Monte Carlo and empirical studies. Given the importance parameters, the two methods estimate the likelihood using Algorithm 1.

---

**Algorithm 1** Importance sampling using an approximating linear state space model(with antithetic variables for variance reduction)

---

- ▷ Select the importance parameters  $b$  and  $C$ .
  - ▷ Obtain the smoothed mean  $\tilde{\theta}_t$  of signal  $\theta_t$  ( $t = 1, \dots, n$ ) for the importance model using either the KFS or the backward-forward (BF) smoother.
  - ▷ Use a simulation smoothing method for linear state space models to sample  $S/2$  trajectories  $\theta^{(s)}$  for the the signal. Two options are the simulation smoother of de Jong and Shephard (1995) and the BF method.
  - ▷ Compute the antithetic draws  $\theta_t^{(s)} = 2\tilde{\theta}_t - \theta_t^{(s-S/2)}$ , for  $s = S/2 + 1 \dots, S$  and  $t = 1, \dots, n$ .
  - ▷ Compute the likelihood of the approximating linear state space model using the Kalman filter or the BF method of Appendix A.
  - ▷ Compute the likelihood estimate. The normalising constant  $a_t$  is given by (10) in the main text under the KFS based method and zero when using the BF method.
- 

## C Monte Carlo study: further results

### C.1 Three other stochastic dynamic models

We first provide details of three additional stochastic dynamic models which are special cases of the general nonlinear and non-Gaussian state space model as introduced in Section 2 of the main paper. The model specifications will be used in our Monte Carlo and empirical studies below.

#### C.1.1 Stochastic conditional duration model

Bauwens and Veredas (2004) propose the stochastic conditional duration model for modelling durations between high-frequency financial transactions. Bauwens and Galli

---

**Algorithm 2** Efficient importance parameters using NAIS

---

- ▷ Initialise the iteration index  $k \leftarrow 0$ .
- ▷ Set the initial values for the importance parameters  $b^{[0]}, C^{[0]}$ . We can do this using a local approximation technique.
- ▷ Choose  $M$  and obtain the Gauss-Hermite nodes  $z_j$  with associated weights  $h(z_j)$  for  $j = 1, \dots, M$ .

**while** convergence criterion is not met **do**

- ▷  $k \leftarrow k + 1$
- ▷ Given the importance parameters  $b^{[k-1]}$  and  $C^{[k-1]}$ , obtain the smoothed means  $\tilde{\theta}_t$  and variances  $V_t$  of the signal  $\theta_t$  ( $t = 1, \dots, n$ ) under the approximating linear state space model. We can use either the KFS or the BF smoother for this purpose.

**for**  $t=1:n$  **do**

- ▷ Generate  $\tilde{\theta}_{tj} = \tilde{\theta}_t + V_t^{1/2} z_j$  for  $j = 1, \dots, n$ .
- ▷ Run a weighted least squares regression with
  - Dependent variable:  $\log p(y_t | \tilde{\theta}_{tj}; \psi)$ .
  - Explanatory vector:  $(1, \tilde{\theta}_{tj}, -0.5 \tilde{\theta}_{tj}^2)'$ .
  - Weight:  $\exp(\frac{1}{2} z_j^2) h(z_j)$  (fast version) or  $\exp(\frac{1}{2} z_j^2) h(z_j) \omega(\tilde{\theta}_{tj}, y_t; \psi)$ .
- ▷ The new importance parameters  $b^{[k]}$  and  $C^{[k]}$  are the coefficients associated with the second and third independent variables of the WLS regression.

**end for**

**end while**

- ▷ Set the efficient importance parameters as  $b = b^{[k]}$  and  $C = C^{[k]}$ .
-

---

**Algorithm 3** Importance parameters using SPDK

---

▷ Initialise the iteration index  $k \leftarrow 0$ .

▷ Set the initial value for the mode estimate  $\hat{\theta}_t^{[0]}$ ,  $t = 1, \dots, n$ .

**while** convergence criterion is not met **do**

▷  $k \leftarrow k + 1$

**for**  $t=1:n$  **do**

▷ Obtain (12) in the main text as second order Taylor series approximation of the log observation density around the current mode estimate

$$b_t^{[k]} = \left. \frac{\partial \log p(y_t | \theta_t; \psi)}{\partial \theta_t} \right|_{\theta_t = \hat{\theta}_t^{[k-1]}}, \quad C_t^{[k]} = - \left. \frac{\partial^2 \log p(y_t | \theta_t; \psi)}{\partial \theta_t \partial \theta'_t} \right|_{\theta_t = \hat{\theta}_t^{[k-1]}}$$

**end for**

▷ Given the importance parameters  $b^{[k]}$  and  $C^{[k]}$ , update the mode estimate  $\hat{\theta}_t^{[k]}$  by running the KFS under the approximating linear state space model.

**end while**

▷ Set the importance parameters as  $b = b^{[k]}$  and  $C = C^{[k]}$ .

---

---

**Algorithm 4** Efficient importance parameters using the standard EIS method

---

▷ Initialise the iteration index  $k \leftarrow 0$ .

▷ Set the initial values for the importance parameters  $b^{[0]}, C^{[0]}$ .

▷ Choose the number of simulations  $S$  and a draw set of  $N(0, 1)$  common random numbers (CRN)  $z_t^{(s)}$ ,  $t = 1, \dots, n$  and  $s = 1, \dots, S/2$ . Set the antithetic draws as  $z_t^{(s)} = -z_t^{(s-S/2)}$  for  $s = S/2 + 1, \dots, S$ .

**while** convergence criterion is not met **do**

    ▷  $k \leftarrow k + 1$

    ▷ Given the importance parameters  $b^{[k-1]}$  and  $C^{[k-1]}$  and the CRNs, use a simulation smoothing method for linear state space models to sample  $S$  trajectories  $\theta^{(s)}$  for the the signal.

**for**  $t=1:n$  **do**

        ▷ Run a weighted least squares regression with

        – Dependent variable:  $\log p(y_t | \theta_t^{(s)}; \psi)$ .

        – Explanatory vector:  $(1, \theta_t^{(s)}, -0.5 \theta_t^{(s)2})'$ .

        – Weight: 1 (fast version) or  $\omega(\theta_t^{(s)}, y_t; \psi)$ .

        ▷ The new importance parameters  $b^{[k]}$  and  $C^{[k]}$  are the coefficients associated with the second and third independent variables of the WLS regression.

**end for**

**end while**

▷ Set the efficient importance parameters as  $b = b^{[k]}$  and  $C = C^{[k]}$ .

---

(2009) consider the efficient importance sampling method for the maximum likelihood estimation of parameters. For an univariate time series of durations  $y_t$ , we consider the model

$$y_t \sim \text{Weibull}(\lambda_t, \xi), \quad \lambda_t = \exp(c + \alpha_t),$$

for  $t = 1, \dots, n$ , where  $\lambda_t$  is the time varying scale parameter and  $\xi$  is the shape parameter of the Weibull distribution. The scalar state variable  $\alpha_t$  is specified as an autoregressive process of order 1. The set of true parameters is chosen to approximately reflect the estimation results of Bauwens and Galli (2009) for price durations. In terms of the state space model specification in Section 2, we have  $c = 0$ ,  $T_t = 0.98$ ,  $Q_t = 0.15^2$  and  $\xi = 1.2$ .

### C.1.2 Stochastic copula

Hafner and Manner (2011) formulate the stochastic copula model for estimating and forecasting time-varying and possibly nonlinear dependence between the time series. We consider a dynamic stochastic bivariate  $t$ -copula. Let  $u_{1t}$  and  $u_{2t}$  be two random variables with uniform  $(0, 1)$  marginal distributions. In our simulation study, we take  $u_t = (u_{1t}, u_{2t})'$  as probability integral transforms of two independent univariate series. We denote  $t_\nu$  as the standardised Student's  $t$  distribution and  $2 \times 2$  matrix  $P$  as the correlation matrix with unity values on the main diagonal and the correlation coefficient  $\rho$  on the two off-diagonal elements. The  $t$ -copula function  $C_{\nu, P}(u_t)$  describes the dependence structure within the vector  $u_t$  and is given by

$$C_{\nu, P}(u_t) = T_{\nu, P} [t_\nu^{-1}(u_{1t}), t_\nu^{-1}(u_{2t})],$$

where  $T_{\nu, P}(a, b)$  is the cumulative density function for the standardised bivariate Student's  $t$  distribution with degrees of freedom  $\nu$  and correlation matrix  $P$ , for any set of variables  $\{a, b\}$ . The copula is invariant under any standardisation of the marginal distributions. It follows that

$$C_{\nu, P}(u_t) = \int_{-\infty}^{t_\nu^{-1}(u_{1t})} \int_{-\infty}^{t_\nu^{-1}(u_{2t})} \frac{\Gamma(\frac{\nu+2}{2})}{\Gamma(\nu/2)\sqrt{(\pi\nu)^2|P|}} \left(1 + \frac{x_t' P^{-1} x_t}{\nu}\right)^{-\frac{\nu+2}{2}} dx_{1t} dx_{2t}, \quad (3)$$

where  $x_t = (x_{1t}, x_{2t})'$ . A possible state space model for the stochastic copula with a time-varying correlation coefficient  $\rho_t$ , and hence a time-varying correlation matrix

$$P_t = \begin{bmatrix} 1 & \rho_t \\ \rho_t & 1 \end{bmatrix},$$

is given by

$$u_t \sim C_{\nu, P_t}(u_t), \quad \rho_t = 2[(1 + \exp(-c - \alpha_t))^{-1} - 0.5],$$

for  $t = 1, \dots, n$ , where the scalar state vector  $\alpha_t$  is specified as an autoregressive process of order 1.

We take the set of true parameters from the empirical study of bivariate time series of financial log-returns in Hafner and Manner (2011). Hence the true parameter values in terms of the state space model in Section 2 are set to  $c = 1$ ,  $T_t = 0.98$  and  $Q_t = 0.01$ . We set  $d_t$  in the state space model such that the unconditional expectation of the correlation coefficient  $\rho_t$  is approximately 0.7. Since Hafner and Manner (2011) do not consider a  $t$ -copula, we take the degrees of freedom  $\nu = 5$  to obtain sufficient tail dependence in our simulations.

### C.1.3 Dynamic Factor Model for Multivariate Poisson Counts

The dynamic factor model for multivariate counts of Jung, Liesenfeld, and Richard (2011) is an example of a multivariate non-Gaussian state space model with possibly a large state vector but with a scalar signal function. Similar multivariate and discrete time series models are treated by Koopman and Lucas (2008). Here we show that we can implement the NAIS method can be implemented for this class of models as well, achieving substantial computational gains. Let  $y_t$  denote a vector of  $J$  counts. The observations are independently distributed conditional on the state vector  $\alpha_t$  with Poisson density as given by

$$p(y_{j,t} | \lambda_{j,t}) = \frac{\exp(-\lambda_{j,t}) \lambda_{j,t}^{y_{j,t}}}{y_{j,t}!}, \quad j = 1, \dots, J, \quad t = 1, \dots, n,$$

where the intensity  $\lambda_{j,t}$  is a nonlinear function of the  $(J + 1) \times 1$  state vector  $\alpha_t = (\alpha_{0,t}, \alpha_{1,t}, \dots, \alpha_{J,t})'$ . In particular, the log of  $\lambda_{j,t}$  is specified as the sum of a common



autoregressive factor  $\alpha_{0,t}$  and an idiosyncratic component  $\alpha_{j,t}$ . The signal is given by

$$\theta_{j,t} = \log(\lambda_{j,t}) = c_j + \gamma_j \alpha_{0,t} + \alpha_{j,t}, \quad j = 1, \dots, J,$$

where  $c_j$  is the intercept and  $\gamma_j$  is the common factor loading. Each state element follows an autoregressive process of order 1 as given by

$$\alpha_{j,t+1} = \phi_j \alpha_{j,t} + \eta_{j,t}, \quad \eta_{j,t} \sim N(0, \sigma_{\eta,j}^2), \quad j = 0, 1, \dots, J,$$

where  $|\phi_j| < 1$  is the autoregressive coefficient and  $\sigma_{\eta,j}^2 > 0$  is the variance while the disturbances  $\eta_{j,t}$  are mutually and serially uncorrelated, for  $j = 0, 1, \dots, J$ .

We implement the NAIS method for the multivariate model by formulating a state space representation as in Section 2 for the univariate time series

$$y_{1,1}, y_{2,1}, \dots, y_{J,1}, y_{1,2}, \dots, y_{J,n}.$$

The indices  $j = 1, \dots, J$  and  $t = 1, \dots, n$  follow the data sequence in corresponding order. Here we adopt the univariate approach of multivariate filtering and smoothing as discussed in Koopman and Durbin (2000). It is based on the univariate state space model with scalar signal  $\theta_{j,t} = c_j + Z_{j,t} \alpha_t$ ,  $j = 1, \dots, J$ , and the two updating equations  $\alpha_{j+1,t} = \alpha_{j,t}$ ,  $j = 1, \dots, J-1$ , and  $\alpha_{1,t+1} = T_{J,t} \alpha_{J,t} + \eta_{J,t}$  with  $\eta_{J,t} \sim N(0, Q_{J,t})$ , for  $t = 1, \dots, n$ . The associating time-varying (or index-varying) system matrices are given by

$$Z_{J,t} = \begin{pmatrix} \gamma_J \\ \iota_J \end{pmatrix}', \quad T_{J,t} = \begin{bmatrix} \phi_0 & 0 & 0 & 0 \\ 0 & \phi_1 & 0 & 0 \\ 0 & 0 & \ddots & 0 \\ 0 & 0 & 0 & \phi_J \end{bmatrix}, \quad Q_{J,t} = \begin{bmatrix} \sigma_{\eta,0}^2 & 0 & 0 & 0 \\ 0 & \sigma_{\eta,1}^2 & 0 & 0 \\ 0 & 0 & \ddots & 0 \\ 0 & 0 & 0 & \sigma_{\eta,J}^2 \end{bmatrix},$$

for each  $t$ , and

$$Z_{j,t} = \begin{pmatrix} \gamma_j \\ \iota_j \end{pmatrix}', \quad T_{j,t} = I_{J+1}, \quad Q_{j,t} = 0,$$

for each  $t$  and where  $\iota_j$  is the  $j$ th column of the  $J \times J$  identity matrix  $I_J$  for  $j = 1, \dots, J$ .

In the Monte Carlo study we simulate multiple time series of counts with  $J = 5$ . The

parameter values are set to those considered by Jung, Liesenfeld, and Richard (2011). The coefficients for the dynamic processes are given by  $\phi_0 = \phi_j = 0.98$ ,  $\sigma_{\eta,0} = 0.1$  and  $\sigma_{\eta,j} = 0.05$  for  $j = 1, \dots, J$ . All constants are set to  $c_j = 1.5$ . The loading coefficients are given by  $\gamma_1 = 1$ ,  $\gamma_2 = 1.2$ ,  $\gamma_3 = 0.8$ ,  $\gamma_4 = 1.5$  and  $\gamma_5 = 0.7$ .

## C.2 Likelihood estimation and design of Monte Carlo study

We examine the performances of log-likelihood estimation via the importance sampling methods that are listed in Table 1 of the main paper. The design of the Monte Carlo study is as follows. We consider 500 random time series of the state space models that are discussed above. The choice of 500 simulations is taken to avoid the dependence of our conclusions on particular trajectories of the simulated states and series. For each simulated time series, we estimate the log-likelihood function at the true parameters a hundred times using different common random numbers. Hence each cell in the presented tables below reflects 50,000 likelihood evaluations. We report the results for the different sample sizes  $n = 1,000$  and  $n = 5,000$  while we use  $S = 200$  importance samples for each likelihood evaluation.

The reported statistics are computed by

$$\text{Bias} = 50000^{-1} \cdot \sum_{i=1}^{500} \sum_{j=1}^{100} \left( \log \hat{L}^j(y^i; \psi) - \log L(y^i; \psi) \right),$$

$$\text{Variance} = 500^{-1} \cdot \sum_{i=1}^{500} 100^{-1} \cdot \sum_{j=1}^{100} \left( \log \hat{L}^j(y^i; \psi) - \log \bar{L}(y^i; \psi) \right)^2,$$

where  $y^i$  is the  $i$ th simulated time series,  $\log \hat{L}^j(y^i; \psi)$  is the “true” log-likelihood value,  $\log \hat{L}^j(y^i; \psi)$  is the  $j$ th estimate of the log-likelihood function for a particular method and  $\log \bar{L}(y^i; \psi) = 100^{-1} \sum_{j=1}^{100} \log L^j(y^i; \psi)$ . The true log-likelihood value is unknown and we approximate it by taking the log of the average of likelihood estimates from the NAIS method. It is based on the NAIS likelihood estimate from  $S = 200 \times 100 = 20,000$  importance samples. Hence the approximation error of the true likelihood is negligible. We compute the mean squared error (MSE) as the sum of the variance and the square of the bias estimate. The variance and the MSE are reported as a ratios with respect to the standard EIS method. Our key summary statistic is the time normalised variance

ratio of method  $a$  against the benchmark method  $b$  and it is given by

$$\text{Variance}_{a/b} \times \left( 1 + \frac{\text{Time}_{\text{I+II}}^a - \text{Time}_{\text{I+II}}^b}{\text{Time}_{\text{II}}^a} \right)^{-1}$$

where  $\text{Variance}_{a/b}$  is the ratio of the Monte Carlo variance for methods  $a$  and  $b$  and  $\text{Time}_j^m$  is the time length of task  $j$ , for  $j = \text{I}, \text{II}, \text{I+II}$ , by method  $m$ , for  $m = a, b$ . We have excluded  $\text{Time}_{\text{I}}^a$  from the denominator because it is a fixed cost and not relevant for drawing additional samples.

The number of nodes for the numerical integration calculations is  $M = 20$ . We base the initialisation of each importance sampling method on the local approximation of SPDK. To reduce the simulation variance for all likelihood evaluations, we use antithetic variables for location as in Durbin and Koopman (2000), except for the NAISc methods. In our study, for all models, we have found no evidence of importance sampling weights that constitute an infinite variance; see the discussions in Koopman, Shephard, and Creal (2009). Our diagnostic procedure includes the verification of how sensitive the importance sampling weights are to artificial outliers as in Richard and Zhang (2007). We have efficiently implemented all methods using MATLAB and C code. The computer code is available from the authors upon request.

### C.3 Monte Carlo results for models with a scalar state

Tables 1 and 2 present the results for two dynamic stochastic model with a scalar state: stochastic conditional duration and stochastic copula models. The findings are similar across the stochastic volatility model of the main paper and these models.

### C.4 Monte Carlo results for models with multiple states

Table 3 reports the findings for the dynamic factor model for multivariate Poisson counts. We have implemented the EIS-BF algorithm as proposed in Jung, Liesenfeld, and Richard (2011). Given that the computer code is more involved for multivariate models, we have not implemented the NAIS-BF and NAIS-BF-Ctrl method. The presented results are similar to the results that are reported for the SV model with  $k = 2$ .

Table 1: LOG-LIKELIHOOD ERRORS FOR THE STOCHASTIC CONDITIONAL DURATION MODEL.

The table presents the numerical and computational performance of different IS methods for log-likelihood estimation. We simulate 500 different realisations from the model. For each of these realisations, we obtain log-likelihood estimates for 100 different sets of random numbers. We estimate the variance associated with each method as the average sample variance across the 500 realisations. We define the mean-square error (MSE) as the sum of the variance and the square of the average bias across the 500 realisations. We show these statistics as ratios with the standard implementation of the EIS method as the benchmark. The time for step 1 column gives the fixed time cost for obtaining the parameters of the importance density, while the time for step 2 refers to the computational cost of sampling from the importance density and calculating the likelihood estimate. The TNVAR column reports the time normalised variance ratio. We list the methods (with their acronyms) in Table 1 of the main paper. We specify the stochastic conditional duration model as:  $y_t \sim \text{Weibull}(\lambda_t, \psi = 1.2)$  with  $\lambda_t = \exp(\alpha_t)$  and  $\alpha_{t+1} = 0.98\alpha_t + \eta_t$  where  $\eta_t \sim N(0, \sigma_\eta^2 = 0.0225)$  for  $t = 1, \dots, n$ .

| $n = 1000, S = 200$ |          |        | Time Step 1     | Time Step 2     | TNVAR |
|---------------------|----------|--------|-----------------|-----------------|-------|
|                     | Variance | MSE    | ( $\times 10$ ) | ( $\times 10$ ) |       |
| SPDK                | 14.888   | 15.034 | 0.052           | 0.212           | 7.039 |
| EIS-BF              | 1.000    | 1.000  | 0.278           | 0.221           | 1.000 |
| EIS-JSDK            | 1.008    | 1.008  | 0.284           | 0.210           | 0.980 |
| NAIS-BF             | 0.562    | 0.561  | 0.114           | 0.207           | 0.302 |
| NAIS-JSDK           | 0.563    | 0.562  | 0.110           | 0.209           | 0.302 |
| NAIS-BF-Ctrl        | 0.378    | 0.379  | 0.112           | 0.222           | 0.216 |
| NAIS-JSDK-Ctrl      | 0.379    | 0.380  | 0.114           | 0.214           | 0.210 |

  

| $n = 5000, S = 200$ |          |        | Time Step 1     | Time Step 2     | TNVAR |
|---------------------|----------|--------|-----------------|-----------------|-------|
|                     | Variance | MSE    | ( $\times 10$ ) | ( $\times 10$ ) |       |
| SPDK                | 12.980   | 21.861 | 0.200           | 1.228           | 5.515 |
| EIS-BF              | 1.000    | 1.000  | 1.766           | 1.325           | 1.000 |
| EIS-JSDK            | 1.012    | 1.011  | 1.762           | 1.208           | 0.919 |
| NAIS-BF             | 0.485    | 0.479  | 0.644           | 1.298           | 0.257 |
| NAIS-JSDK           | 0.499    | 0.492  | 0.629           | 1.243           | 0.252 |
| NAIS-BF-Ctrl        | 0.401    | 0.398  | 0.716           | 1.339           | 0.226 |
| NAIS-JSDK-Ctrl      | 0.405    | 0.402  | 0.694           | 1.257           | 0.212 |

Table 2: LOG-LIKELIHOOD ERRORS FOR THE STOCHASTIC COPULA MODEL.

The table presents the numerical and computational performance of different IS methods for log-likelihood estimation. We simulate 500 different realisations from the model. For each of these realisations, we obtain log-likelihood estimates for 100 different sets of random numbers. We estimate the variance associated with each method as the average sample variance across the 500 realisations. We define the mean-square error (MSE) as the sum of the variance and the square of the average bias across the 500 realisations. We show these statistics as ratios with the standard implementation of the EIS method as the benchmark. The time for step 1 column gives the fixed time cost for obtaining the parameters of the importance density, while the time for step 2 refers to the computational cost of sampling from the importance density and calculating the likelihood estimate. The TNVAR column reports the time normalised variance ratio. We list the methods (with their acronyms) in Table 1 of the main paper. We specify the stochastic copula model as:  $u_{1t}, u_{2t} \sim C_{\nu=5, P_t}(u_t)$ ,  $\rho_t = (1 - \exp(-\alpha_t)(1 + \exp(-\alpha_t))^{-1}$ ,  $\alpha_{t+1} = 0.98\alpha_t + \eta_t$ , where  $\eta_t \sim N(0, \sigma_\eta^2 = 0.01)$ .

| $n = 1000, S = 200$ |          |        | Time Step 1     | Time Step 2     | TNVAR |
|---------------------|----------|--------|-----------------|-----------------|-------|
|                     | Variance | MSE    | ( $\times 10$ ) | ( $\times 10$ ) |       |
| SPDK                | 10.480   | 10.484 | 0.027           | 0.397           | 6.485 |
| EIS-BF              | 1.000    | 1.000  | 0.257           | 0.411           | 1.000 |
| EIS-JSDK            | 0.989    | 0.989  | 0.285           | 0.397           | 1.025 |
| NAIS-BF             | 0.622    | 0.622  | 0.146           | 0.401           | 0.477 |
| NAIS-JSDK           | 0.612    | 0.612  | 0.143           | 0.401           | 0.467 |
| NAIS-BF-Ctrl        | 0.385    | 0.386  | 0.151           | 0.419           | 0.312 |
| NAIS-JSDK-Ctrl      | 0.388    | 0.388  | 0.155           | 0.408           | 0.308 |

  

| $n = 5000, S = 200$ |          |        | Time Step 1     | Time Step 2     | TNVAR |
|---------------------|----------|--------|-----------------|-----------------|-------|
|                     | Variance | MSE    | ( $\times 10$ ) | ( $\times 10$ ) |       |
| SPDK                | 16.229   | 16.294 | 0.110           | 2.024           | 9.390 |
| EIS-BF              | 1.000    | 1.000  | 1.516           | 2.093           | 1.000 |
| EIS-JSDK            | 1.001    | 1.001  | 1.581           | 2.046           | 1.010 |
| NAIS-BF             | 0.543    | 0.543  | 0.856           | 2.054           | 0.405 |
| NAIS-JSDK           | 0.549    | 0.548  | 0.808           | 2.043           | 0.400 |
| NAIS-BF-Ctrl        | 0.329    | 0.330  | 0.885           | 2.132           | 0.258 |
| NAIS-JSDK-Ctrl      | 0.328    | 0.329  | 0.869           | 2.061           | 0.247 |

Table 3: LOG-LIKELIHOOD ERRORS FOR THE DYNAMIC FACTOR MODEL FOR MULTIVARIATE POISSON COUNTS.

The table presents the numerical and computational performance of different IS methods for log-likelihood estimation. We simulate 500 different realisations from the model. For each of these realisations, we obtain log-likelihood estimates for 100 different sets of random numbers. We estimate the variance associated with each method as the average sample variance across the 500 realisations. We define the mean-square error (MSE) as the sum of the variance and the square of the average bias across the 500 realisations. We show these statistics as ratios with the standard implementation of the EIS method as the benchmark. The time for step 1 column gives the fixed time cost for obtaining the parameters of the importance density (in seconds), while the time for step 2 refers to the computational cost of sampling from the importance density and calculating the likelihood estimate. The TNVAR column reports the time normalised variance ratio. The last column reports the normalised variance when we ignore the fixed time cost of step 1. We list the methods (with their acronyms) in Table 1 of the main paper.

| $n = 1000, S = 200$ | Variance | MSE    | Time   | Time   | TNVAR |
|---------------------|----------|--------|--------|--------|-------|
|                     |          |        | Step 1 | Step 2 |       |
| SPDK                | 22.268   | 22.653 | 0.065  | 0.118  | 3.056 |
| EIS-BF              | 1.000    | 1.000  | 0.283  | 0.195  | 1.00  |
| EIS-JSDK            | 0.975    | 0.975  | 0.235  | 0.116  | 0.182 |
| NAIS-JSDK           | 0.496    | 0.496  | 0.099  | 0.118  | 0.072 |
| NAIS-JSDK-Ctrl      | 0.302    | 0.302  | 0.103  | 0.161  | 0.061 |
| $n = 5000, S = 200$ | Variance | MSE    | Time   | Time   | TNVAR |
|                     |          |        | Step 1 | Step 2 |       |
| SPDK                | 16.612   | 34.246 | 0.385  | 0.587  | 1.915 |
| EIS-BF              | 1.000    | 1.000  | 1.616  | 1.088  | 1.000 |
| EIS-JSDK            | 1.014    | 1.012  | 1.210  | 0.592  | 0.166 |
| NAIS-JSDK           | 0.448    | 0.441  | 0.755  | 0.612  | 0.053 |
| NAIS-JSDK-Ctrl      | 0.361    | 0.358  | 0.757  | 0.831  | 0.061 |

## References

- Bauwens, L. and F. Galli (2009). Efficient importance sampling for ml estimation of scd models. *Computational Statistics and Data Analysis* 53(6), 1974–1992.
- Bauwens, L. and D. Veredas (2004). The stochastic conditional duration model: A latent factor model for the analysis of financial durations. *Journal of Econometrics* 119(2), 381–412.
- de Jong, P. and N. Shephard (1995). The simulation smoother for time series models. *Biometrika* 82, 339–350.
- Durbin, J. and S. J. Koopman (1997). Monte Carlo maximum likelihood estimation for non-Gaussian state space models. *Biometrika* (84), 669–684.
- Durbin, J. and S. J. Koopman (2000). Time series analysis of non-Gaussian observations based on state space models from both classical and Bayesian perspectives. *Journal of the Royal Statistical Society, Series B* (62), 3–56.
- Hafner, C. and H. Manner (2011). Dynamic stochastic copula models: Estimation, inference and applications. *Journal of Applied Econometrics*. forthcoming.
- Jung, R., R. Liesenfeld, and J. F. Richard (2011). Dynamic Factor Models for Multivariate Count Data: An Application to Stock-Market Trading Activity. *Journal of Business and Economic Statistics* 29(1), 73–85.
- Koopman, S. J. and J. Durbin (2000). Fast filtering and smoothing for multivariate state space models. *Journal of Time Series Analysis* 21(3), 281–296.
- Koopman, S. J. and A. Lucas (2008). A non-Gaussian panel time series model for estimating and decomposing default risk. *Journal of Business and Economic Statistics* 26(4), 510–525.
- Koopman, S. J., N. Shephard, and D. Creal (2009). Testing the assumptions behind importance sampling. *Journal of Econometrics* 149(1), 2–11.
- Monahan, J. F. (2001). *Numerical methods of statistics*. Cambridge: Cambridge University Press.
- Richard, J. F. and W. Zhang (2007). Efficient high-dimensional importance sampling. *Journal of Econometrics* 141, 1385–1411.

Shephard, N. and M. Pitt (1997). Likelihood analysis of non-Gaussian measurement time series. *Biometrika* 84, 653–667.
